# Supplementary material for: SAR-mediated Similarity Assessment of the Property Profile for New, Silicon-Based AChE/BChE Inhibitors
Source: PubMed Central journal article supplement (PMC6862691; doi:10.3390/ijms20215385), 2019-10-29
Supplement: ijms-20-05385-s001.pdf [file ijms-20-05385-s001.pdf]

## Supplementary Materials

# SAR-mediated Similarity Assessment of Property Profile for New Silicon-based AChE/BChE Inhibitors

Andrzej Bak <sup>1,\*</sup>, Hana Pizova <sup>2,\*</sup>, Violetta Kozik <sup>1</sup>, Katarina Vorcakova <sup>3</sup>, Jiri Kos <sup>4</sup>, Jakub Tremel <sup>5</sup>, Klara Odehnalova <sup>2</sup>, Michal Oravec <sup>6</sup>, Ales Imramovsky <sup>7</sup>, Pavel Bobal <sup>2</sup>, Adam Smolinski <sup>8</sup>, Zdeněk Trávníček <sup>4</sup> and Josef Jampilek <sup>4,\*</sup>

<sup>1</sup> Institute of Chemistry, University of Silesia, Szkolna 9, 40 007 Katowice, Poland; violetta.kozik@us.edu.pl (V.K.)

<sup>2</sup> Department of Chemical Drugs, Faculty of Pharmacy, University of Veterinary and Pharmaceutical Sciences, Palackeho 1, 612 42 Brno, Czech Republic; pavelbobal@yahoo.com (P.B.)

<sup>3</sup> Department of Biological and Biochemical Sciences, Faculty of Chemical Technology, University of Pardubice, Studentska 573, 532 10 Pardubice, Czech Republic; katarina.vorcakova@upce.cz (K.V.)

<sup>4</sup> Division of Biologically Active Complexes and Molecular Magnets, Regional Centre of Advanced Technologies and Materials, Faculty of Science, Palacky University, Slechtitelu 27, 783 71 Olomouc, Czech Republic, jiri.kos@upol.cz (J.K.); zdenek.travniczek@upol.cz (Z.T.)

<sup>5</sup> Department of Molecular Biology and Pharmaceutical Biotechnology, Faculty of Pharmacy, University of Veterinary and Pharmaceutical Sciences, Palackeho 1, 612 42 Brno, Czech Republic; tremlj@vfu.cz (J.T.)

<sup>6</sup> Global Change Research Institute CAS, Belidla 986/4a, 60300 Brno, Czech Republic; oravec.m@czechglobe.cz

<sup>7</sup> Institute of Organic Chemistry and Technology, Faculty of Chemical Technology, University of Pardubice, Studentska 573, 532 10 Pardubice, Czech Republic; ales.imramovsky@upce.cz (A.I.)

<sup>8</sup> Department of Energy Saving and Air Protection, Central Mining Institute, Plac Gwarkow 1, 40 166 Katowice, Poland; smolin@gig.katowice.pl (A.S.)

\* Correspondence: andrzej.bak@us.edu.pl (A.B.); pizovah@gmail.com (H.P.); josef.jampilek@gmail.com (J.J.)



**Table S2.** Protocol about BBB permeation of galanthamine predicted using ACD/Percepta 14.0.0. Predicted values – Blood-Brain Barrier transport (rodent).

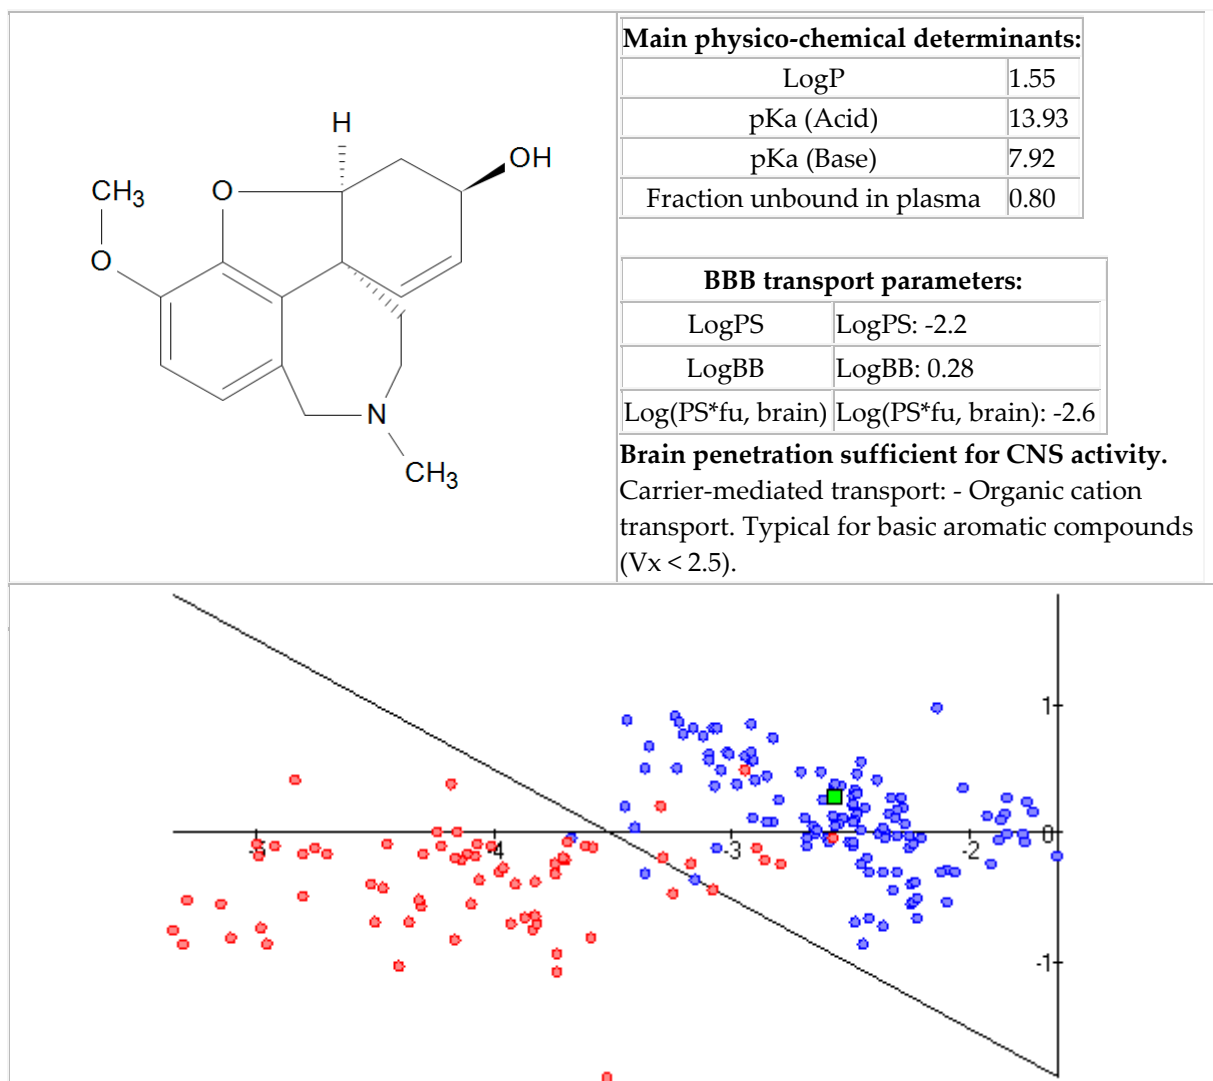

**Table S3.** Protocol about BBB permeation of donepezil predicted using ACD/Percepta 14.0.0. Predicted values – Blood-Brain Barrier transport (rodent).

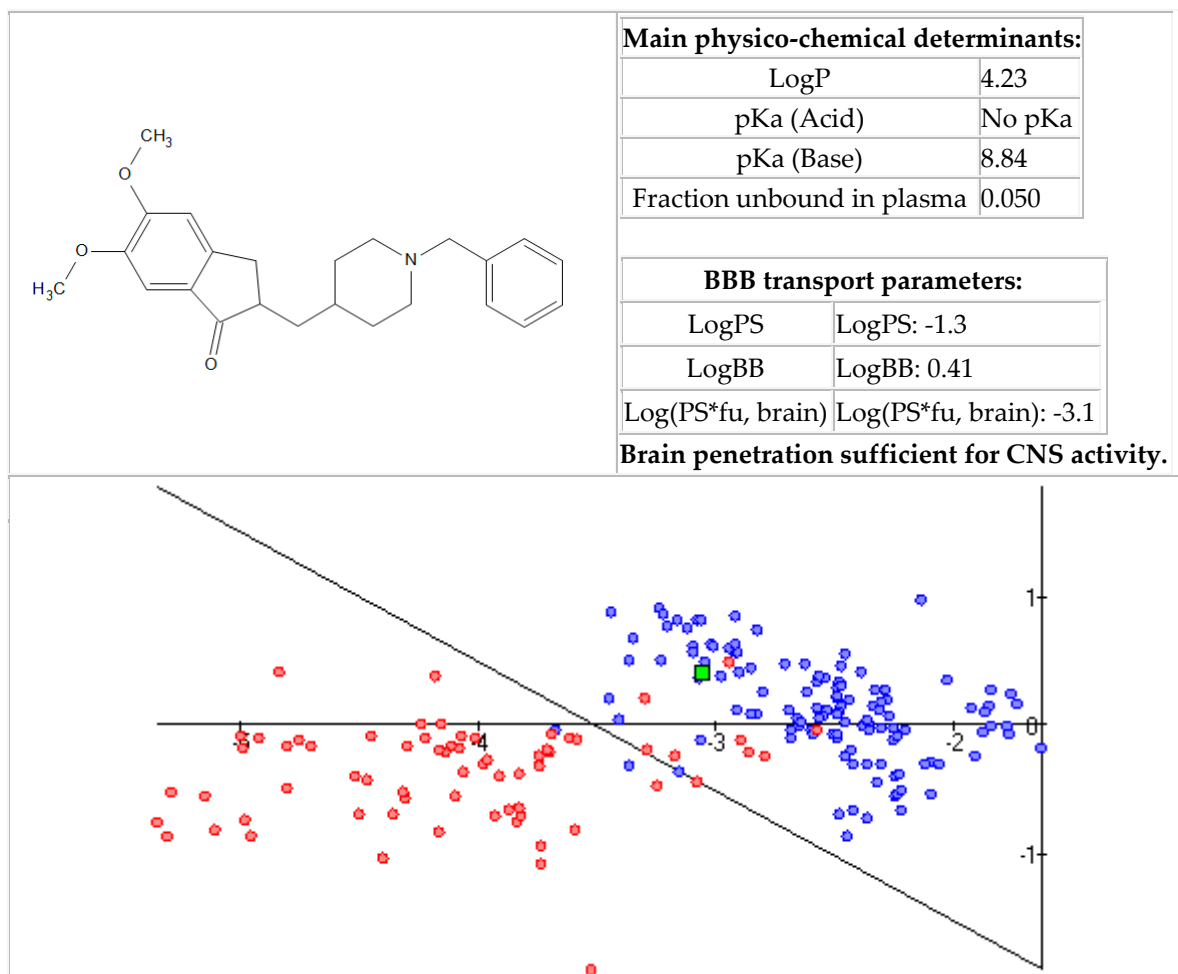

**Table S4.** Protocol about BBB permeation of tacrine predicted using ACD/Percepta 14.0.0. Predicted values – Blood-Brain Barrier transport (rodent).

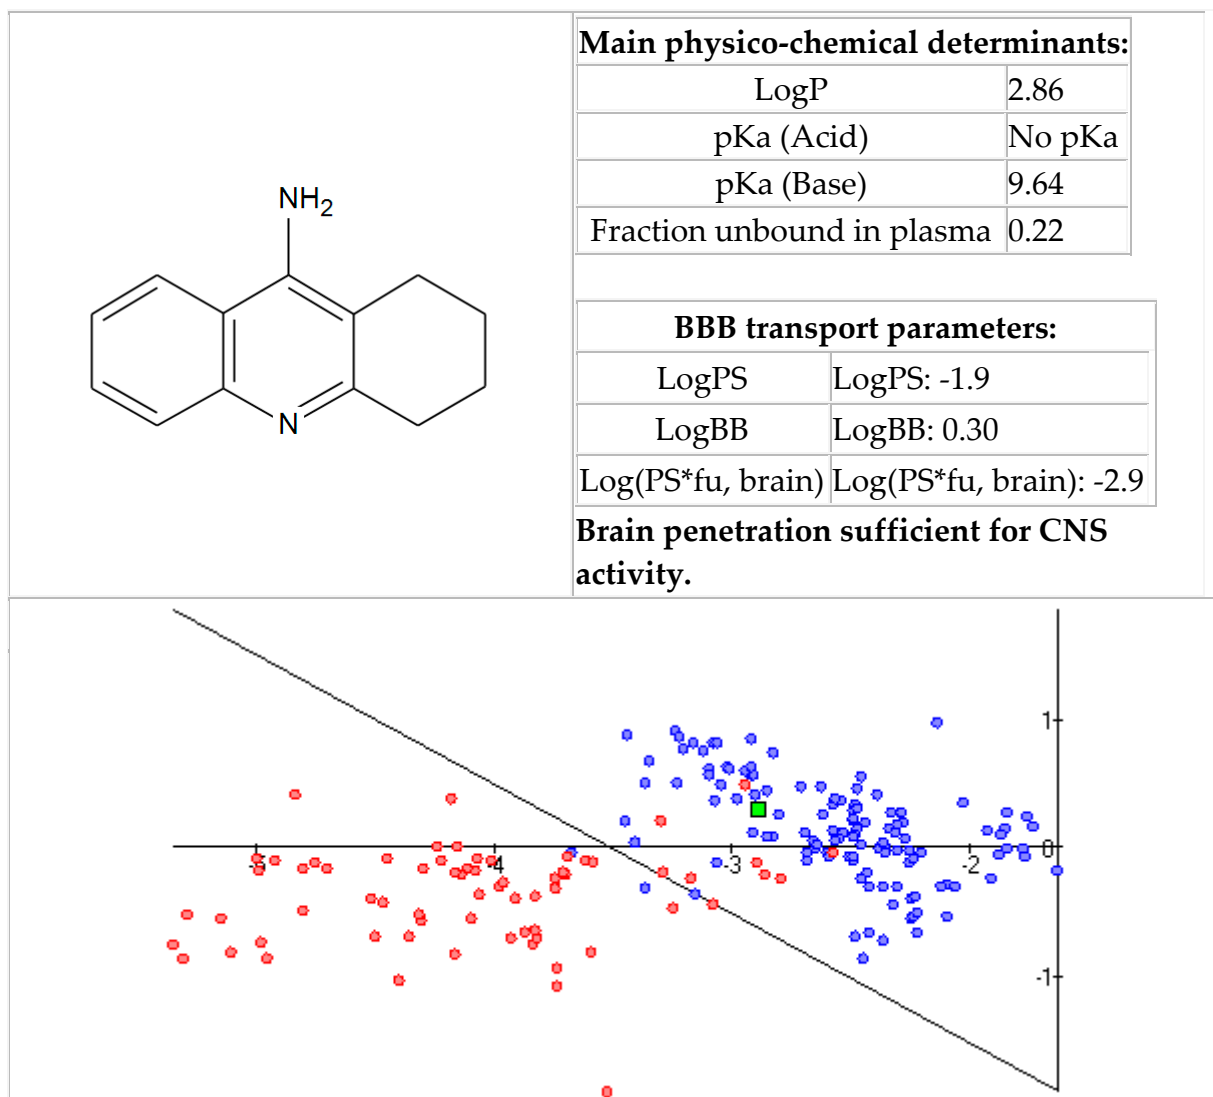

**Table S5.** Protocol about BBB permeation of Comp. No. 2 predicted using ACD/Percepta 14.0.0. Predicted values – Blood-Brain Barrier transport (rodent).

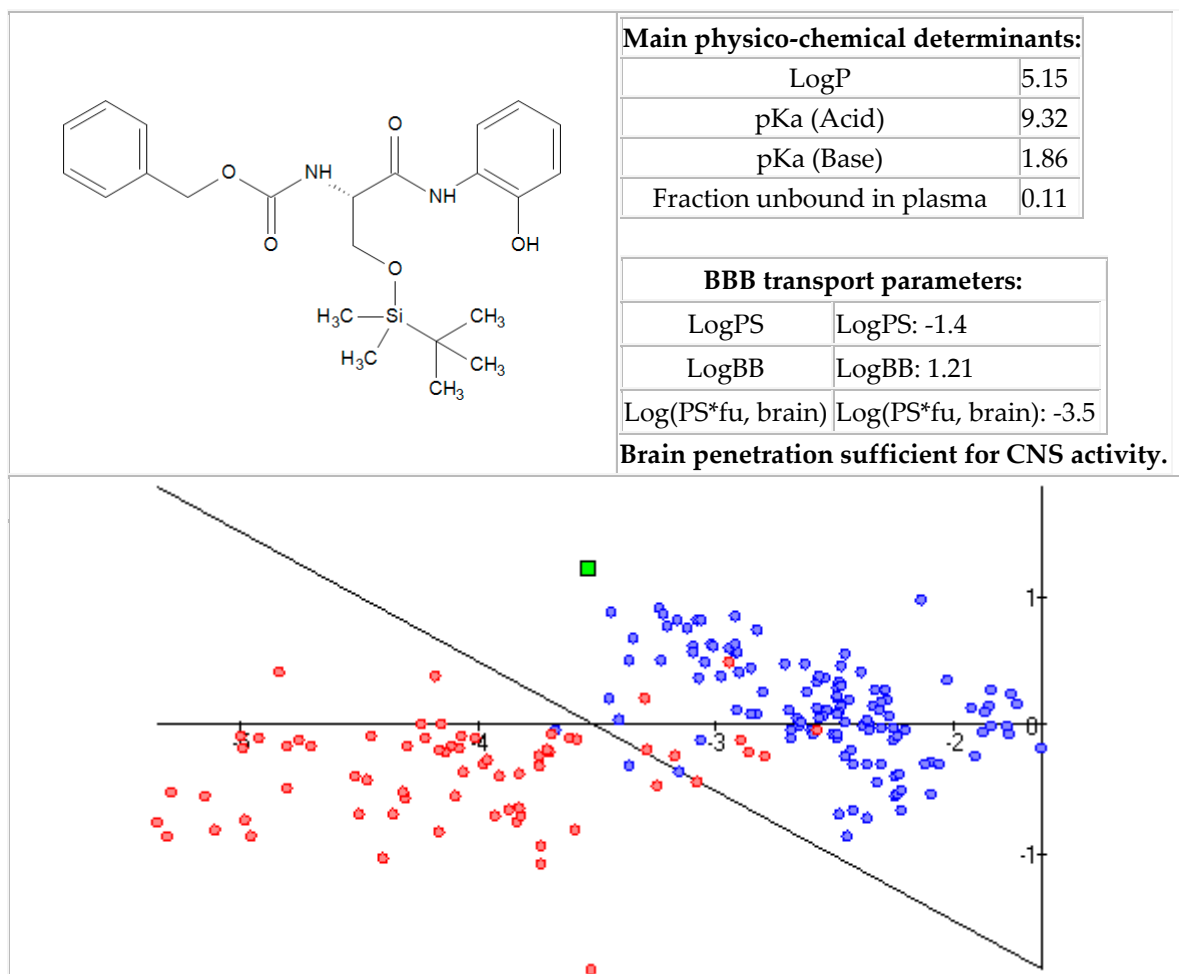

**Table S6.** Protocol about BBB permeation of Comp. No. 3 predicted using ACD/Percepta 14.0.0. Predicted values – Blood-Brain Barrier transport (rodent).

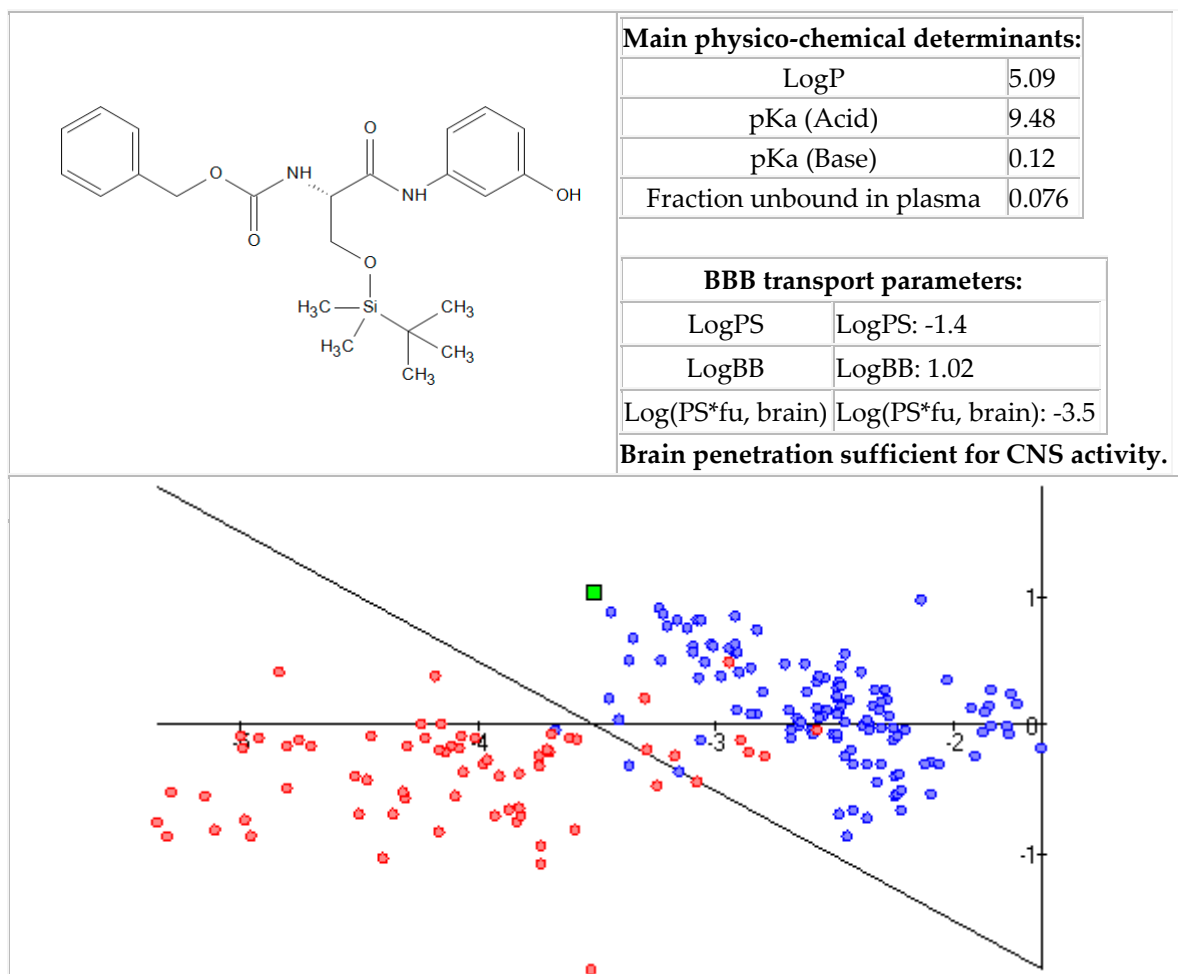

**Table S7.** Protocol about BBB permeation of Comp. No. 4 predicted using ACD/Percepta 14.0.0. Predicted values – Blood-Brain Barrier transport (rodent).

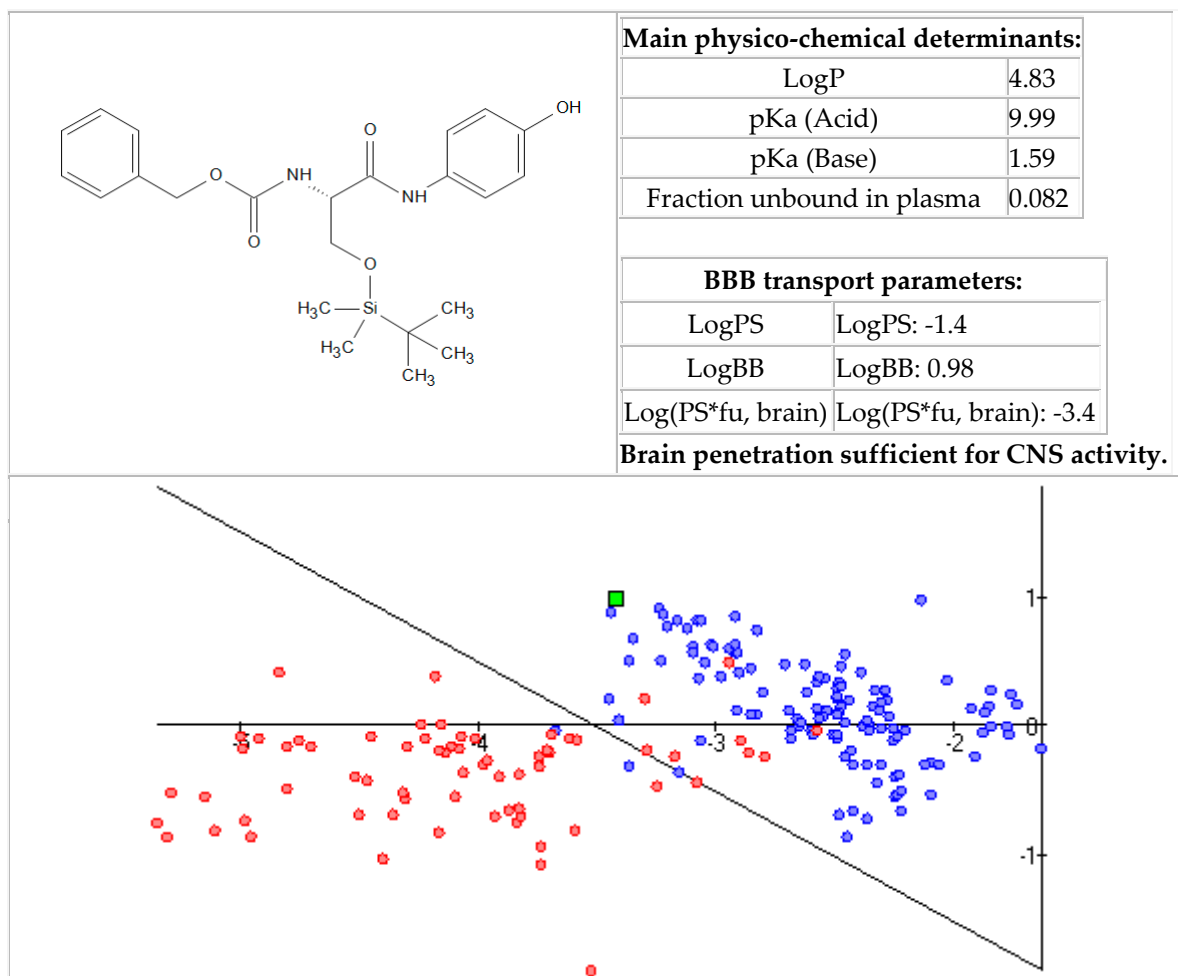



**Table S8.** Protocol about BBB permeation of Comp. No. 25 predicted using ACD/Percepta 14.0.0. Predicted values – Blood-Brain Barrier transport (rodent).

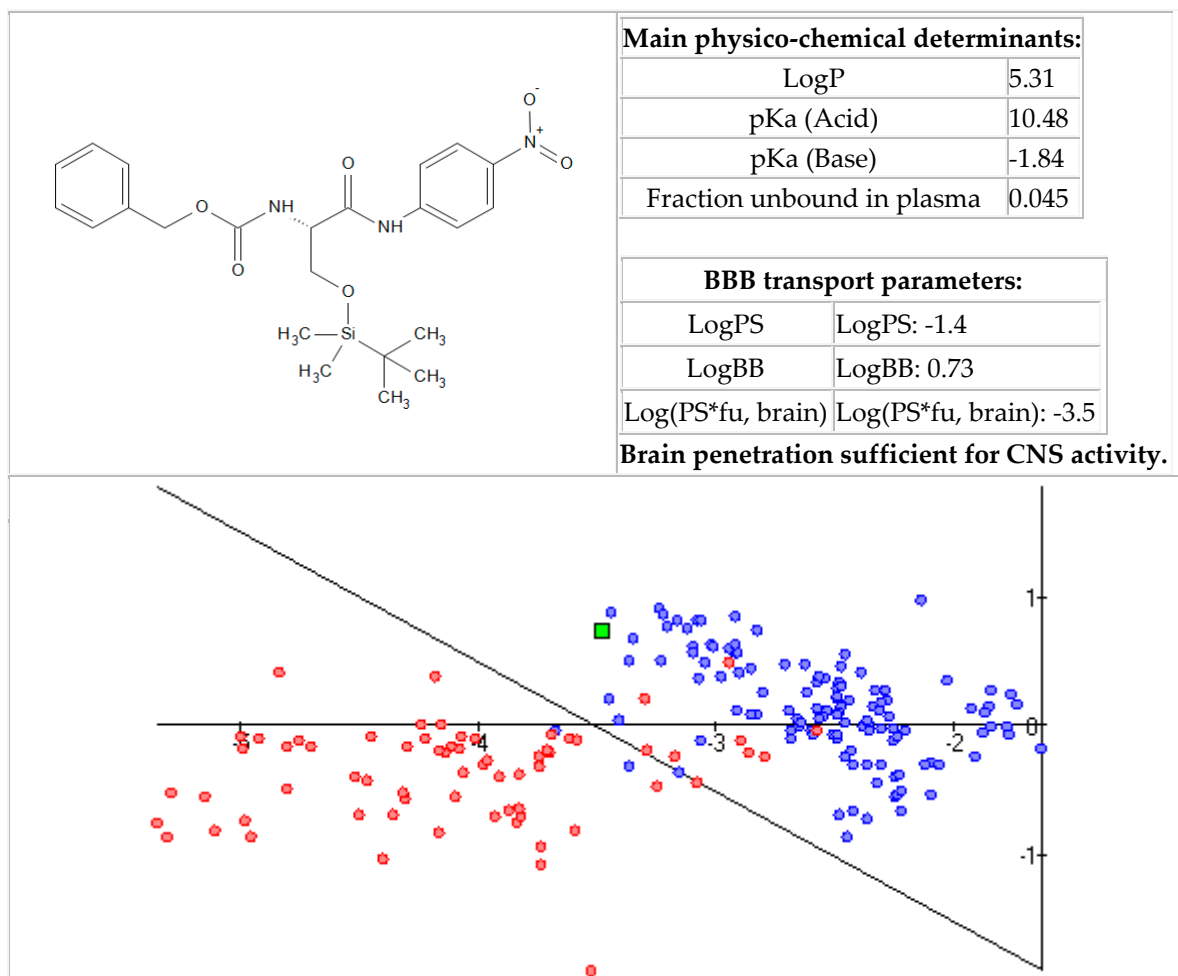

**Table S9.** Protocol about BBB permeation of Comp. No. 7 predicted using ACD/Percepta 14.0.0. Predicted values – Blood-Brain Barrier transport (rodent).

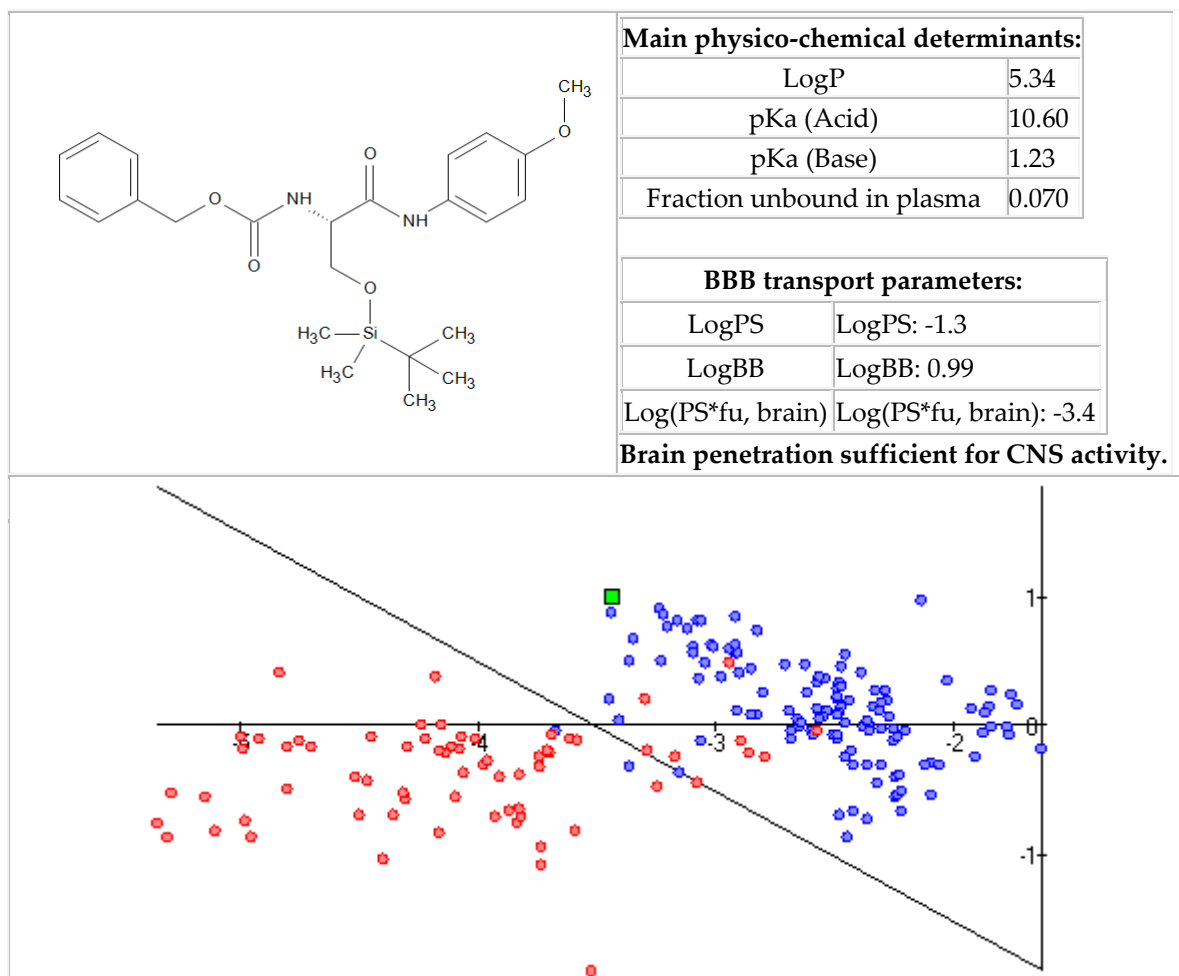

**Table S10.** Protocol about BBB permeation of Comp. No. 6 predicted using ACD/Percepta 14.0.0. Predicted values – Blood-Brain Barrier transport (rodent).

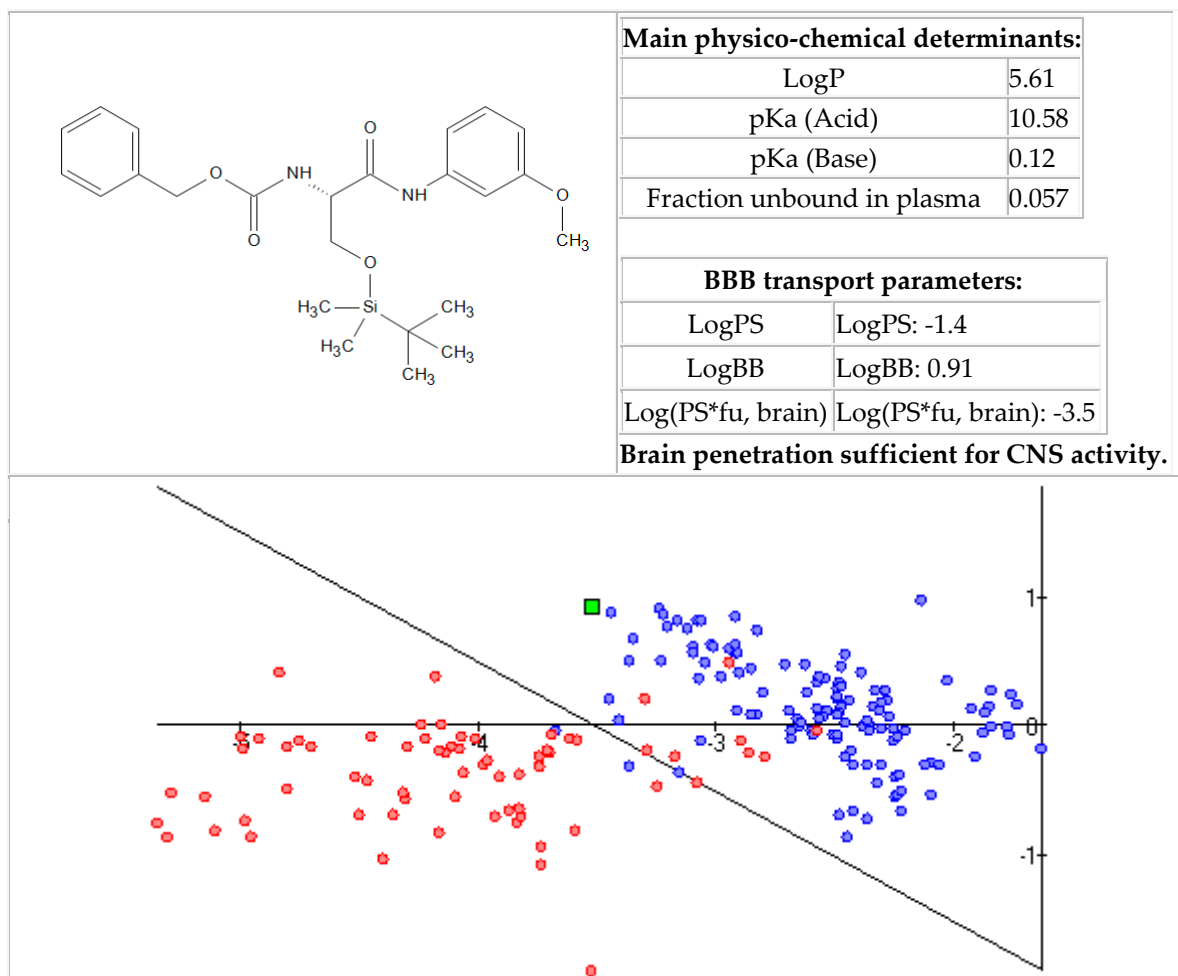

**Table S11.** Theoretically estimated partition coefficient calculated by set of alternative methods for silicon-based carbamates 1–25.

| No. | logP <sup>a</sup> | miLogP <sup>b</sup> | ClogP <sup>c</sup> | ClogP <sup>d</sup> | ClogP <sup>e</sup> | ClogP <sup>f</sup> | ClogP <sup>g</sup> | MlogP <sup>h</sup> | AlogP <sup>i</sup> | ClogP <sup>j</sup> | ClogP <sup>k</sup> |
|-----|-------------------|---------------------|--------------------|--------------------|--------------------|--------------------|--------------------|--------------------|--------------------|--------------------|--------------------|
| 1   | 4.64              | 6.83                | 4.43               | 2.63               | 5.06               | 5.01               | 6.34               | 2.74               | 5.00               | 4.72               | 5.01               |
| 2   | 4.32              | 6.56                | 4.09               | 2.35               | 4.64               | 4.73               | 5.97               | 2.25               | 4.73               | 4.24               | 4.66               |
| 3   | 4.43              | 6.32                | 4.09               | 2.35               | 4.41               | 4.73               | 5.98               | 2.25               | 4.73               | 3.89               | 4.66               |
| 4   | 4.46              | 6.35                | 4.09               | 2.35               | 4.41               | 4.73               | 5.59               | 2.25               | 4.73               | 3.89               | 4.66               |
| 5   | 4.76              | 6.83                | 4.36               | 2.38               | 4.56               | 4.76               | 6.23               | 2.46               | 4.99               | 4.24               | 4.98               |
| 6   | 4.81              | 6.86                | 4.36               | 2.38               | 5.15               | 4.76               | 6.50               | 2.46               | 4.99               | 4.80               | 4.98               |
| 7   | 4.80              | 6.88                | 4.36               | 2.38               | 5.15               | 4.76               | 6.35               | 2.46               | 4.99               | 4.80               | 4.98               |
| 8   | 4.74              | 7.23                | 4.78               | 3.10               | 4.93               | 5.48               | 6.80               | 2.95               | 5.49               | 4.70               | 5.38               |
| 9   | 4.75              | 7.25                | 4.78               | 3.10               | 5.58               | 5.48               | 6.80               | 2.95               | 5.49               | 5.27               | 5.38               |
| 10  | 4.75              | 7.28                | 4.78               | 3.10               | 5.58               | 5.48               | 6.80               | 2.95               | 5.49               | 5.27               | 5.38               |
| 11  | 4.79              | 6.94                | 4.54               | 2.77               | 4.88               | 5.15               | 6.16               | 3.12               | 5.21               | 4.36               | 5.11               |
| 12  | 4.78              | 6.97                | 4.54               | 2.77               | 5.48               | 5.15               | 6.87               | 3.12               | 5.21               | 4.92               | 5.11               |
| 13  | 4.78              | 6.99                | 4.54               | 2.77               | 5.48               | 5.15               | 6.72               | 3.12               | 5.21               | 4.92               | 5.11               |
| 14  | 5.31              | 7.46                | 5.04               | 3.15               | 5.20               | 5.53               | 6.53               | 3.22               | 5.67               | 4.80               | 5.64               |
| 15  | 5.31              | 7.48                | 5.04               | 3.15               | 6.05               | 5.53               | 7.06               | 3.22               | 5.67               | 5.36               | 5.64               |
| 16  | 5.34              | 7.50                | 5.04               | 3.15               | 6.05               | 5.53               | 7.30               | 3.22               | 5.67               | 5.36               | 5.64               |
| 17  | 5.32              | 7.59                | 5.16               | 3.15               | 5.32               | 5.80               | 6.59               | 3.32               | 5.75               | 5.05               | 5.70               |
| 18  | 5.32              | 7.61                | 5.16               | 3.42               | 6.20               | 5.80               | 7.58               | 3.32               | 5.75               | 5.61               | 5.70               |
| 19  | 5.31              | 7.64                | 5.16               | 3.42               | 6.20               | 5.80               | 7.54               | 3.32               | 5.75               | 5.61               | 5.70               |
| 20  | 5.08              | 7.67                | 5.28               | 3.52               | 4.96               | 5.90               | 6.22               | 3.53               | 5.94               | 5.12               | 5.90               |
| 21  | 5.08              | 7.70                | 5.28               | 3.52               | 6.41               | 5.90               | 7.45               | 3.53               | 5.94               | 5.68               | 5.90               |
| 22  | 5.12              | 7.72                | 5.28               | 3.52               | 6.41               | 5.90               | 7.78               | 3.53               | 5.94               | 5.68               | 5.90               |
| 23  | 4.67              | 6.74                | 3.51               | 0.65               | 4.91               | 4.97               | 6.25               | 2.86               | 4.90               | 4.69               | 5.39               |
| 24  | 4.72              | 6.76                | 3.51               | 0.65               | 5.37               | 4.97               | 6.72               | 2.86               | 4.90               | 5.26               | 4.84               |
| 25  | 4.82              | 6.79                | 3.51               | 0.65               | 5.37               | 4.97               | 6.91               | 2.86               | 4.90               | 5.26               | 4.84               |

<sup>a</sup> clogPS, <sup>b</sup> Molinspirations, <sup>c</sup> OSIRIS property explorer, <sup>d</sup> HyperChem 7.0, <sup>e</sup> Sybyl X, <sup>f</sup> Marvin Sketch (ChemAxon) 15, <sup>g</sup> ChemSketch 2015, <sup>h</sup> Dragon 6.0, <sup>i</sup> Dragon 6.0, <sup>j</sup> Kowwin, <sup>k</sup> XlogP3.

**Table S12.** Matrix of correlation coefficients (n=25,  $\alpha=0.05$ ) of linear relationships between particular partition coefficients and experimental lipophilicity data ( $\log k$ ) for silicon-based carbamates **1–25**.

|                     | $\log k$ | $\log P^a$ | miLogP <sup>b</sup> | ClogP <sup>c</sup> | ClogP <sup>d</sup> | ClogP <sup>e</sup> | ClogP <sup>f</sup> | ClogP <sup>g</sup> | MlogP <sup>h</sup> | AlogP <sup>i</sup> | ClogP <sup>j</sup> | ClogP <sup>k</sup> |
|---------------------|----------|------------|---------------------|--------------------|--------------------|--------------------|--------------------|--------------------|--------------------|--------------------|--------------------|--------------------|
| $\log k$            | 1        |            |                     |                    |                    |                    |                    |                    |                    |                    |                    |                    |
| $\log P^a$          | 0.79     | 1          |                     |                    |                    |                    |                    |                    |                    |                    |                    |                    |
| miLogP <sup>b</sup> | 0.90     | 0.89       | 1                   |                    |                    |                    |                    |                    |                    |                    |                    |                    |
| ClogP <sup>c</sup>  | 0.65     | 0.73       | 0.87                | 1                  |                    |                    |                    |                    |                    |                    |                    |                    |
| ClogP <sup>d</sup>  | 0.41     | 0.52       | 0.70                | 0.95               | 1                  |                    |                    |                    |                    |                    |                    |                    |
| ClogP <sup>e</sup>  | 0.88     | 0.76       | 0.78                | 0.60               | 0.43               | 1                  |                    |                    |                    |                    |                    |                    |
| ClogP <sup>f</sup>  | 0.87     | 0.81       | 0.97                | 0.85               | 0.69               | 0.73               | 1                  |                    |                    |                    |                    |                    |
| ClogP <sup>g</sup>  | 0.84     | 0.73       | 0.76                | 0.55               | 0.39               | 0.95               | 0.72               | 1                  |                    |                    |                    |                    |
| MlogP <sup>h</sup>  | 0.90     | 0.80       | 0.90                | 0.71               | 0.52               | 0.75               | 0.92               | 0.73               | 1                  |                    |                    |                    |
| AlogP <sup>i</sup>  | 0.85     | 0.84       | 0.98                | 0.91               | 0.76               | 0.74               | 0.98               | 0.71               | 0.90               | 1                  |                    |                    |
| ClogP <sup>j</sup>  | 0.91     | 0.75       | 0.81                | 0.52               | 0.31               | 0.93               | 0.76               | 0.91               | 0.79               | 0.74               | 1                  |                    |
| ClogP <sup>k</sup>  | 0.88     | 0.84       | 0.96                | 0.83               | 0.64               | 0.71               | 0.95               | 0.68               | 0.90               | 0.96               | 0.74               | 1                  |

<sup>a</sup> clogPS, <sup>b</sup> Molinspirations, <sup>c</sup> OSIRIS property explorer, <sup>d</sup> HyperChem 7.0, <sup>e</sup> Sybyl X, <sup>f</sup> Marvin Sketch (ChemAxon) 15, <sup>g</sup> ChemSketch 2015, <sup>h</sup> Dragon 6.0, <sup>i</sup> Dragon 6.0, <sup>j</sup> Kowwin, <sup>k</sup> XlogP3.
